# Supplementary material for: New structurally diverse photoactive cadmium coordination polymers
Source: Royal Society of Chemistry journal article supplement (doi:10.1039/d1dt03405g), 2021-01-01
Supplement: d1dt03405g1.pdf [file d1dt03405g1.pdf]

## Supporting Information

### New Structurally Diverse Photoactive Cadmium Coordination Polymers†

**Ning Wang,<sup>a#</sup> Bing-Fan Long,<sup>a#</sup> Xian-Hong Yin,<sup>a</sup> Zhong-jing Huang,<sup>a</sup> Yan Mi,<sup>a</sup> Fei-Long Hu<sup>\*a</sup> David James Young<sup>\*b</sup>**

*<sup>a</sup> Key Laboratory of Chemistry and Engineering of Forest Products, State Ethnic Affairs Commission, Guangxi Key Laboratory of Chemistry and Engineering of Forest Products, Guangxi Collaborative Innovation Center for Chemistry and Engineering of Forest Products, Guangxi University for Nationalities, Nanning 530006, China*

*<sup>b</sup> College of Engineering, IT and Environment, Charles Darwin University, Darwin, NT 0909, Australia*

## Table of contents

|                                                                                                                                                                                |    |
|--------------------------------------------------------------------------------------------------------------------------------------------------------------------------------|----|
| Experimental Section.....                                                                                                                                                      | 4  |
| Materials and Instruments.....                                                                                                                                                 | 4  |
| Single-crystal Structure Determination .....                                                                                                                                   | 4  |
| Fig. S1. <sup>1</sup> H NMR (a) and <sup>13</sup> C NMR (b) spectra of CH <sub>3</sub> -bpeb (CDCl <sub>3</sub> ).....                                                         | 5  |
| Fig. S2. The <sup>1</sup> H NMR spectra of CP <sub>1</sub> before UV irradiation (a) and after irradiation under UV light (b) (λ = 365 nm) ( <i>d</i> <sub>6</sub> -DMSO)..... | 6  |
| Fig. S3. The <sup>1</sup> H NMR spectra of CP <sub>2</sub> before UV irradiation (a) and after irradiation under UV light (b) (λ = 365 nm) ( <i>d</i> <sub>6</sub> -DMSO)..... | 7  |
| Fig. S4. The <sup>1</sup> H NMR spectra of CP <sub>3</sub> before UV irradiation (a) and after irradiation under UV light (b) (λ = 365 nm) ( <i>d</i> <sub>6</sub> -DMSO)..... | 8  |
| Fig. S5. The <sup>1</sup> H NMR spectra of CP <sub>4</sub> before UV irradiation (a) and after irradiation under UV light (b) (λ = 365 nm) ( <i>d</i> <sub>6</sub> -DMSO)..... | 9  |
| Fig. S6. <sup>1</sup> H NMR spectrum of bdpdc (CDCl <sub>3</sub> ).....                                                                                                        | 10 |
| Fig. S7. Thermogravimetric analysis of CP <sub>1</sub> -CP <sub>4</sub> before (a) and after (b) UV light irradiation. ....                                                    | 10 |
| Fig. S8. The PXRD patterns of CP <sub>1</sub> (a), CP <sub>2</sub> (b), CP <sub>3</sub> (c), CP <sub>4</sub> (d).....                                                          | 12 |
| Fig. S9. IR spectra of CH <sub>3</sub> -bpeb (a), CP <sub>1</sub> (b), CP <sub>2</sub> (c), CP <sub>3</sub> (d), CP <sub>4</sub> (e). ....                                     | 13 |
| Fig. S10. The asymmetric unit of CP <sub>1</sub> , showing ellipsoids at the 30% probability level.....                                                                        | 14 |
| Fig. S11. The coordination environment of Cd (II) in CP <sub>1</sub> .....                                                                                                     | 14 |
| Fig. S12. [Cd <sub>8</sub> (CH <sub>3</sub> -bpeb) <sub>4</sub> (oba) <sub>2</sub> ] units of CP <sub>1</sub> expand into a 2D layer along the (-122) plane. ....              | 14 |
| Fig. S13. Adjacent two-dimensional layers in CP <sub>1</sub> are stabilized by π···π and C-H···π interactions. ....                                                            | 15 |
| Fig. S14. The asymmetric unit of CP <sub>2</sub> , showing ellipsoids at the 30% probability level.....                                                                        | 15 |
| Fig. S15. The coordination environment of Cd (II) in CP <sub>2</sub> .....                                                                                                     | 15 |
| Fig. S16. The ditopic carboxyl ligands of CP <sub>2</sub> extend the structure along the b axis. ....                                                                          | 15 |
| Fig. S17. The adjacent two-dimensional layers in CP <sub>2</sub> are stabilized by lone pair···π interactions. ....                                                            | 16 |
| Fig. S18. The asymmetric unit of CP <sub>3</sub> , showing ellipsoids at the 30% probability level.....                                                                        | 16 |
| Fig. S19. The coordination environment of Cd (II) in CP <sub>3</sub> .....                                                                                                     | 16 |

|                                                                                                                                                                            |    |
|----------------------------------------------------------------------------------------------------------------------------------------------------------------------------|----|
| Fig. S20. The rhombic $[\text{Cd}_4(\text{pbda})_2]$ unit of $\text{CP}_3$ is extended into a 1D chain motif with a corner sharing model. ....                             | 16 |
| Fig. S21. The 2D layer structure of $\text{CP}_3$ is packed along the a axis direction.....                                                                                | 17 |
| Fig. S22. The adjacent two-dimensional layers in $\text{CP}_3$ are stabilized by C-H $\cdots\pi$ interactions.                                                             | 17 |
| Fig. S23. The asymmetric unit of $\text{CP}_4$ , showing ellipsoids at the 30% probability level.....                                                                      | 17 |
| Fig. S24. The coordination environment of Cd (II) in $\text{CP}_4$ . ....                                                                                                  | 18 |
| Fig. S25. A wave-like 2D network of $[\text{Cd}_8(\text{bpa})_4]$ along c axis. ....                                                                                       | 18 |
| Scheme. S2 Representation of the $\text{CH}_3$ -bpeb pairs in structures $\text{CP}_1$ - $\text{CP}_4$ . ....                                                              | 18 |
| Fig. S26. $^1\text{H}$ NMR spectra of $\text{CH}_3$ -bpeb and bdpcd ( $\text{CDCl}_3$ ).....                                                                               | 18 |
| Fig. S27. The mass spectrum of bdpcd.....                                                                                                                                  | 19 |
| Fig. S28. Microscopic images of the mechanical response of $\text{CP}_1$ (a), $\text{CP}_3$ (b), $\text{CP}_4$ (c) at different times under 365nm UV lamp irradiation..... | 19 |
| Fig. S29. Microscopic images of the fluorescence contrast of $\text{CP}_3$ after extended UV illumination times. ....                                                      | 20 |
| Fig. S30. The thermogravimetric analysis of $\text{CP}_3$ after the crystal was solvent-free. ....                                                                         | 20 |
| Fig. S31. $^1\text{H}$ NMR spectra of $\text{CP}_3$ before and after desolvation and irradiation under UV light ( $\lambda = 365 \text{ nm}$ ) ( $d_6$ -DMSO). ....        | 20 |
| Fig. S32. PXRD patterns of $\text{CP}_3$ before and after desolvation.....                                                                                                 | 21 |
| Fig. S33. Solid-state emission spectra of $\text{CP}_3$ after different heating times.....                                                                                 | 21 |
| References .....                                                                                                                                                           | 21 |

## Experimental Section

### Materials and Instruments

Analytical grade chemicals were obtained commercially and used without further purification. Elemental analyses (C, H and N) were performed using a PE 2400 II elemental analyzer. **FT-IR** spectra were recorded with a Nicolet Magna-IR 550 spectrometer on dry KBr disks in the 4000-400  $\text{cm}^{-1}$  range. Thermogravimetric analyses (**TGA**) were performed using a Mettler TGA thermal analyzer under a  $\text{N}_2$  atmosphere with a heating rate of 10  $^\circ\text{C min}^{-1}$  in the temperature region 20-1000  $^\circ\text{C}$ . Powder X-ray diffraction (**PXRD**) patterns were collected on a Bruker D8 advance diffractometer using graphite monochromatized  $\text{Cu K}\alpha$  radiation. **NMR** spectra were recorded at ambient temperature on a Bruker AVANCE 400M spectrometer.  $^1\text{H}$  NMR chemical shifts were referenced to the solvent signal in  $\text{CDCl}_3$  or  $d_6$ -DMSO.  $^{13}\text{C}$  NMR spectra were recorded at a resonance frequency of 101.6 MHz on a Bruker AVANCE 400M spectrometer.

### Single-crystal Structure Determination

Single-crystal X-ray diffraction data for **CP<sub>1</sub>-CP<sub>4</sub>** were recorded on a Bruker Smart CCD diffractometer with a graphite monochromated  $\text{Mo K}\alpha$  radiation ( $\lambda = 0.71073 \text{ \AA}$ ) at 293 K. Structures were solved by Direct Methods and refined by full-matrix least-squares techniques<sup>1-3</sup> using the *SHELXL-2017* program<sup>4, 5</sup>. Non-hydrogen atoms were refined with anisotropic displacement parameters<sup>6</sup>. The H atoms bonded to C and N atoms were positioned with idealized geometry and refined with fixed isotropic displacement parameters.

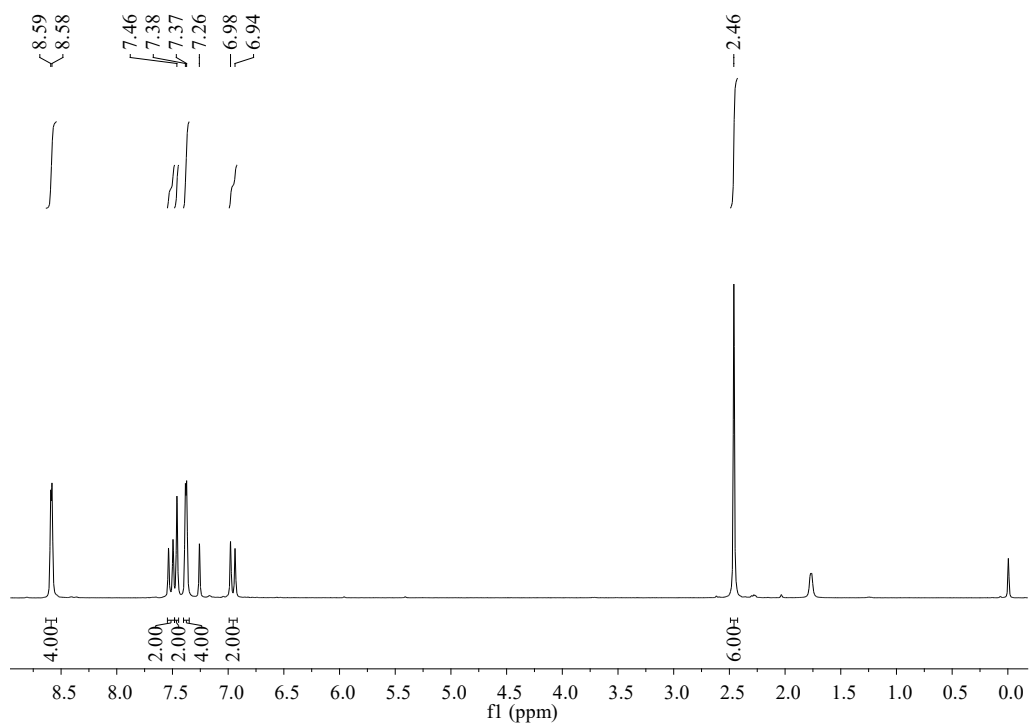

(a)

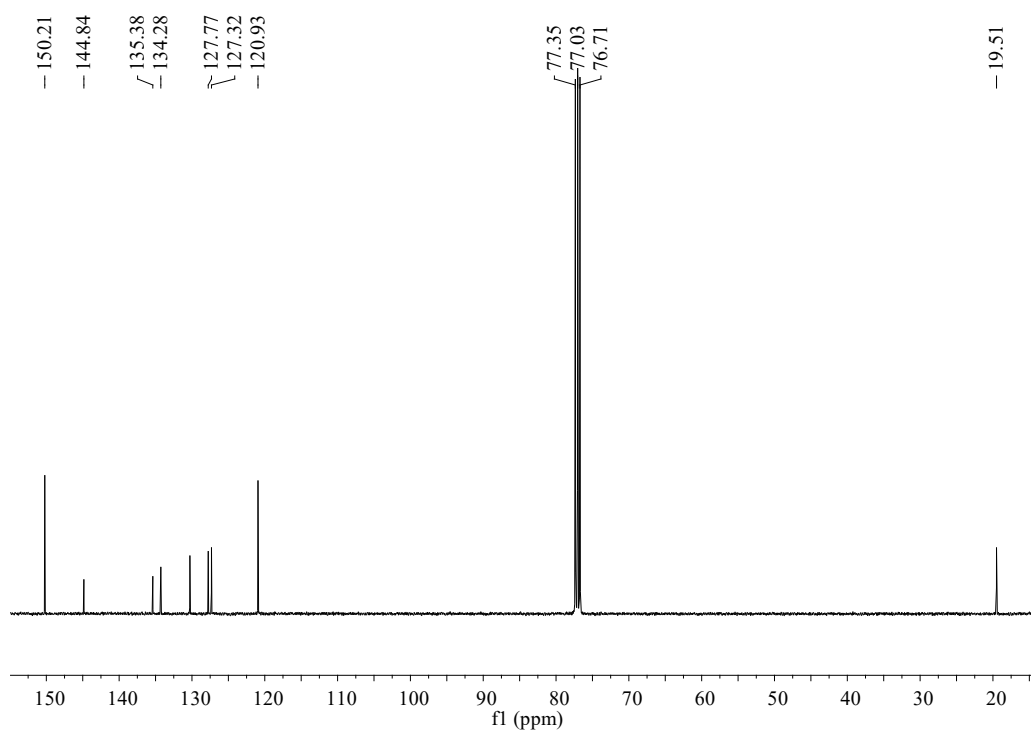

(b)

Fig. S1.  $^1\text{H}$  NMR (a) and  $^{13}\text{C}$  NMR (b) spectra of  $\text{CH}_3\text{-bpeb}$  ( $\text{CDCl}_3$ )

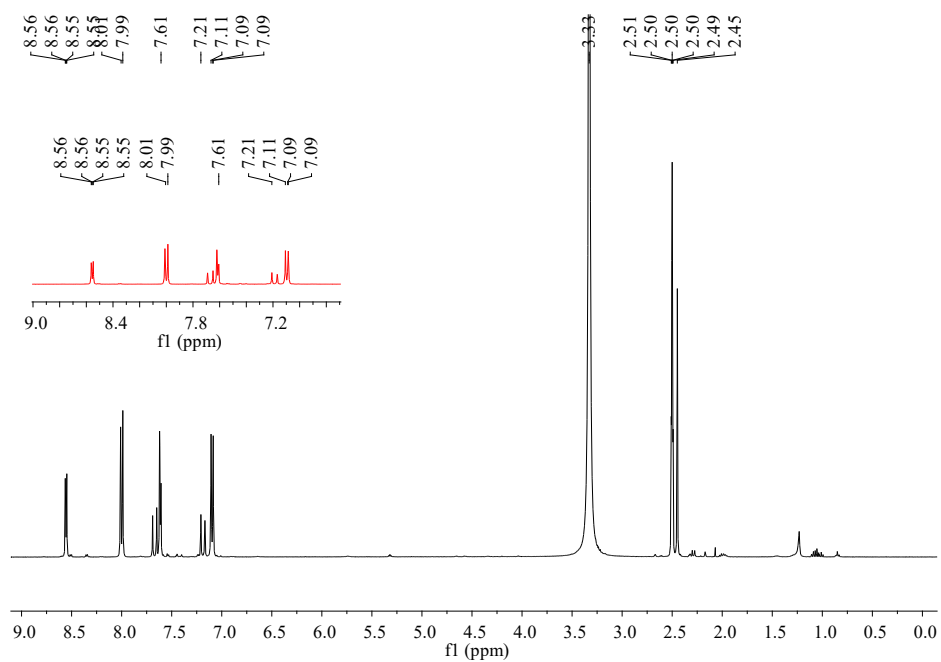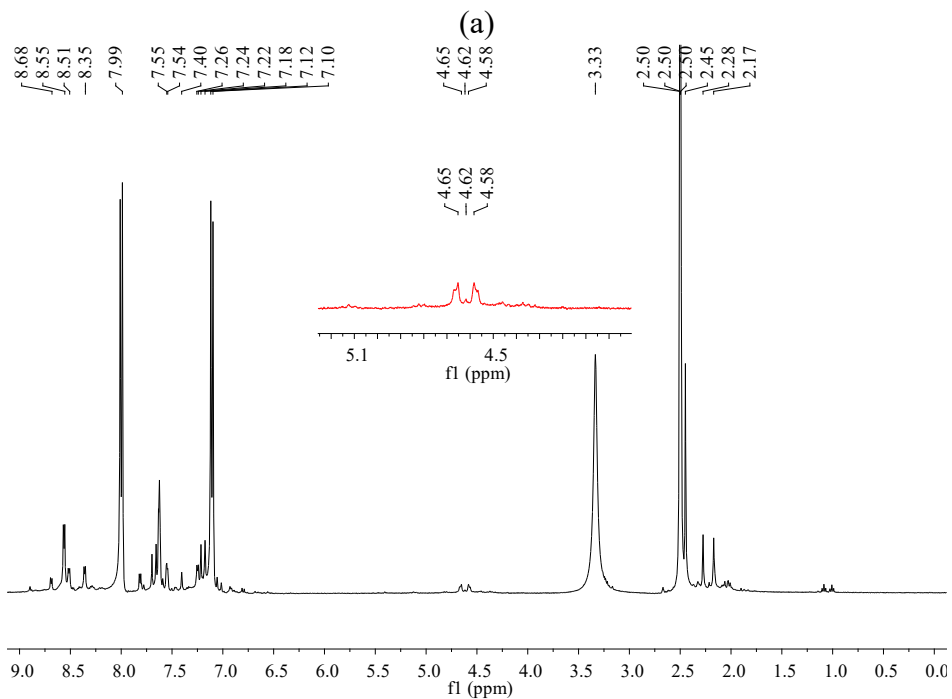

(b)

Fig. S2. The  $^1\text{H}$  NMR spectra of  $\text{CP}_1$  before UV irradiation (a) and after irradiation under UV light (b) ( $\lambda = 365 \text{ nm}$ ) ( $d_6$ -DMSO).

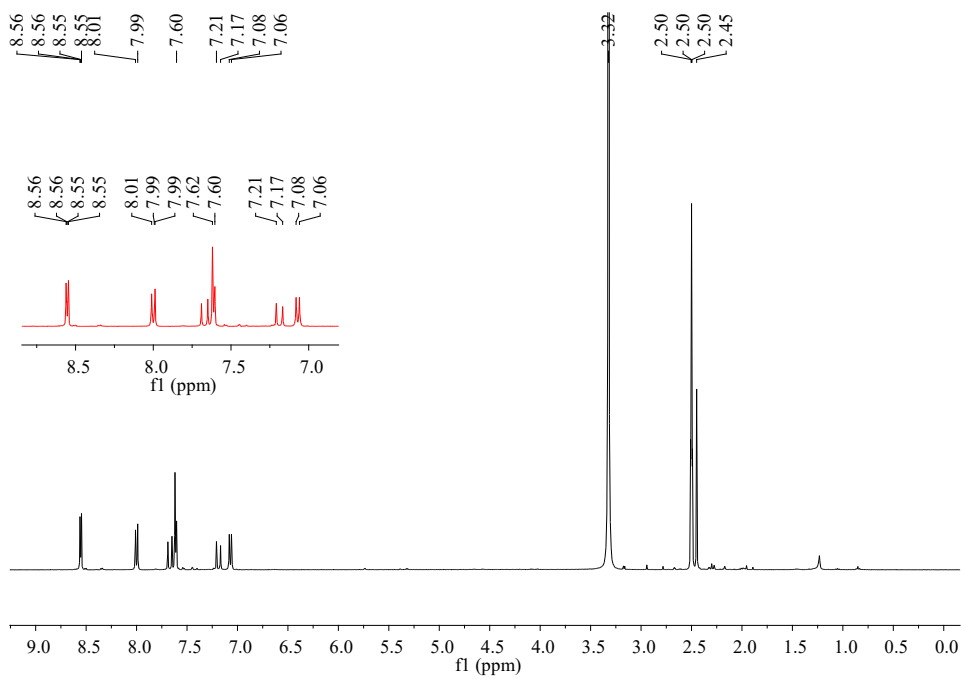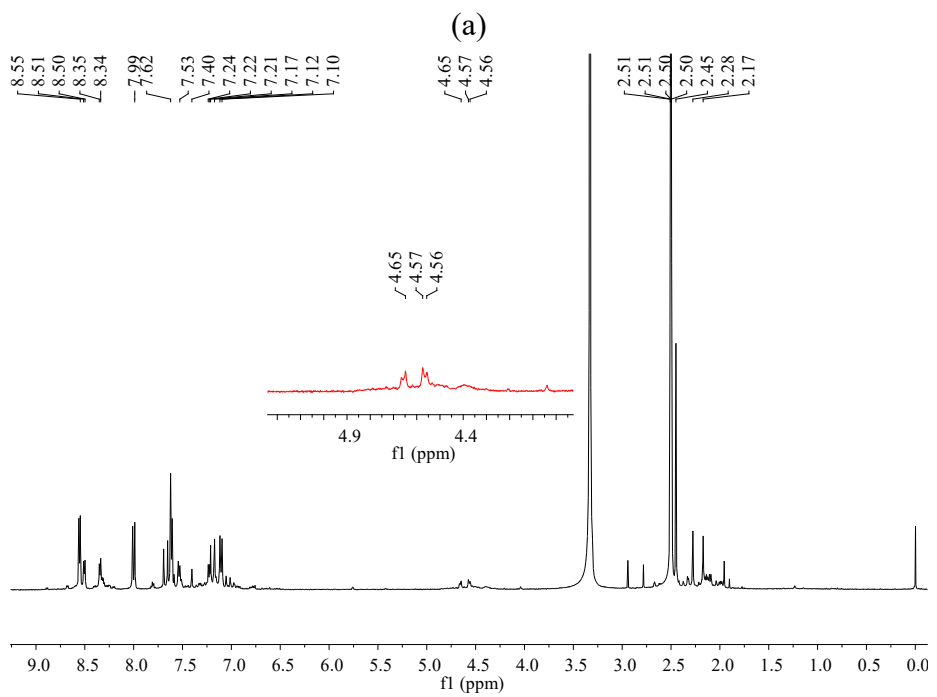

(b)

Fig. S3. The  $^1\text{H}$  NMR spectra of  $\text{CP}_2$  before UV irradiation (a) and after irradiation under UV light (b) ( $\lambda = 365$  nm) ( $d_6$ -DMSO).

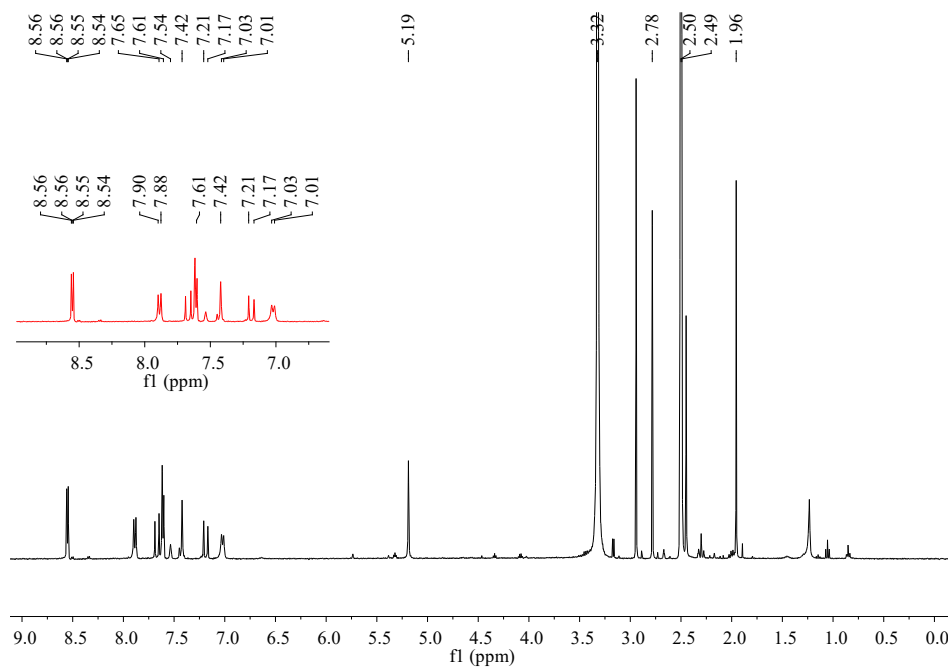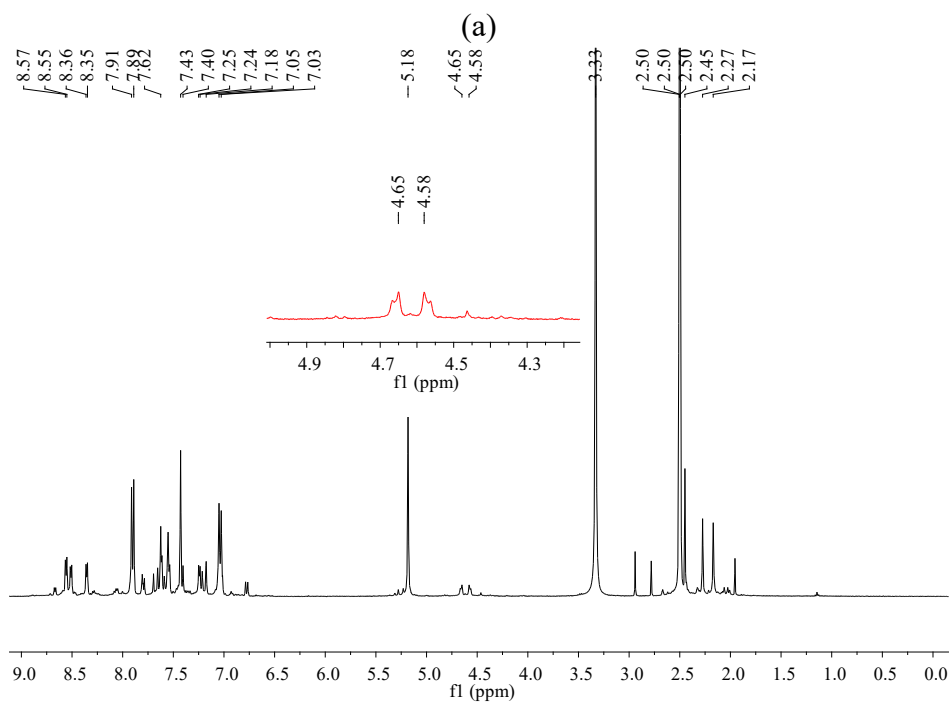

(a)

(b)

Fig. S4. The  $^1\text{H}$  NMR spectra of  $\text{CP}_3$  before UV irradiation (a) and after irradiation under UV light (b) ( $\lambda = 365 \text{ nm}$ ) ( $d_6$ -DMSO).



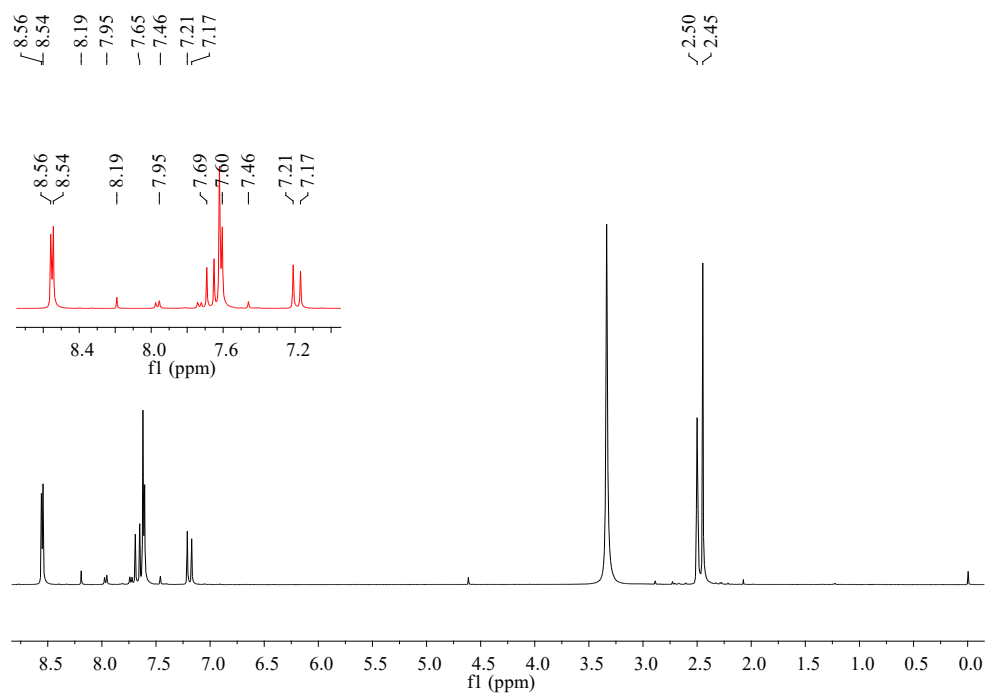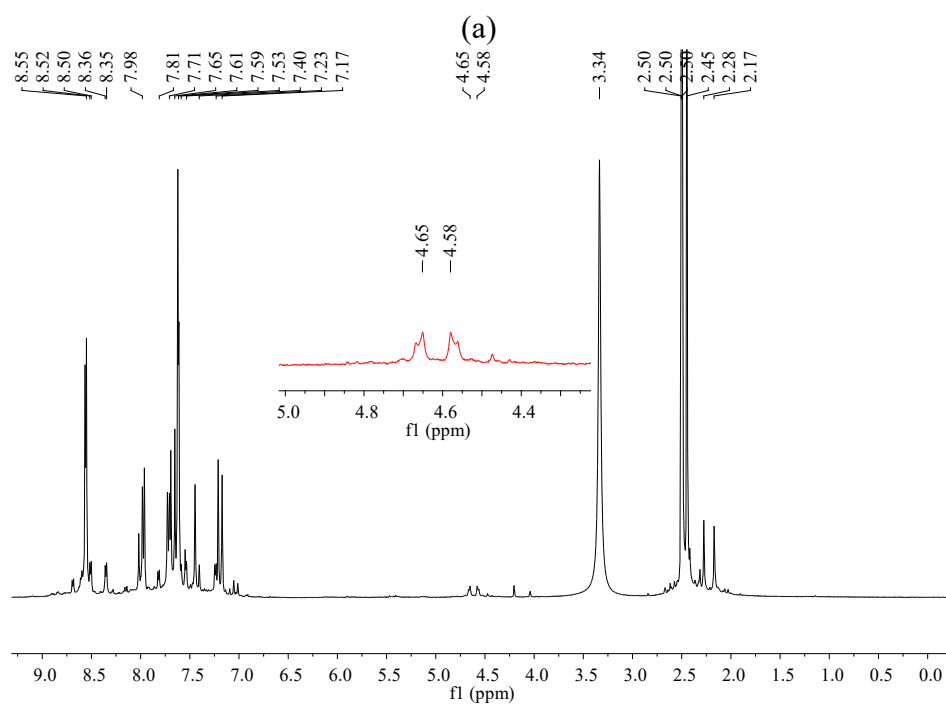

(b)

Fig. S5. The  $^1\text{H}$  NMR spectra of  $\text{CP}_4$  before UV irradiation (a) and after irradiation under UV light (b) ( $\lambda = 365 \text{ nm}$ ) ( $d_6$ -DMSO).

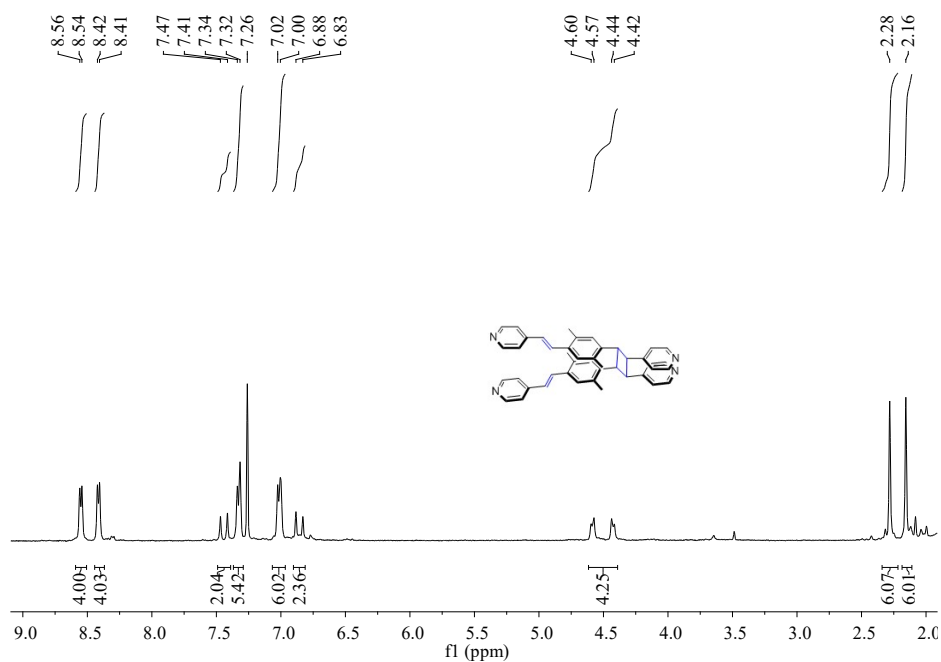

Fig. S6.  $^1\text{H}$  NMR spectrum of bdpcd ( $\text{CDCl}_3$ ).

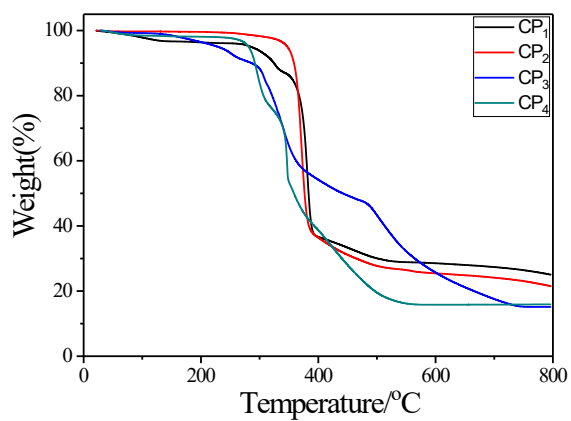

(a)

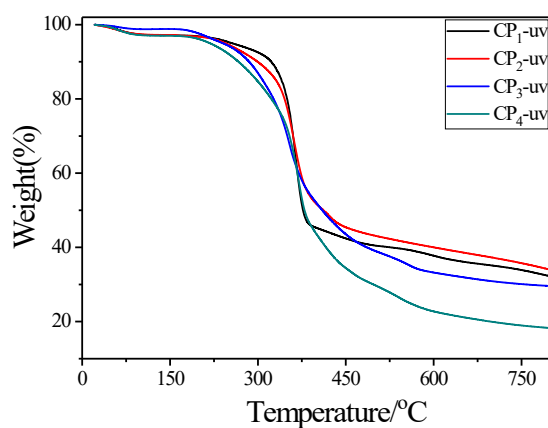

(b)

Fig. S7. Thermogravimetric analysis of  $\text{CP}_1$ - $\text{CP}_4$  before (a) and after (b) UV light irradiation.

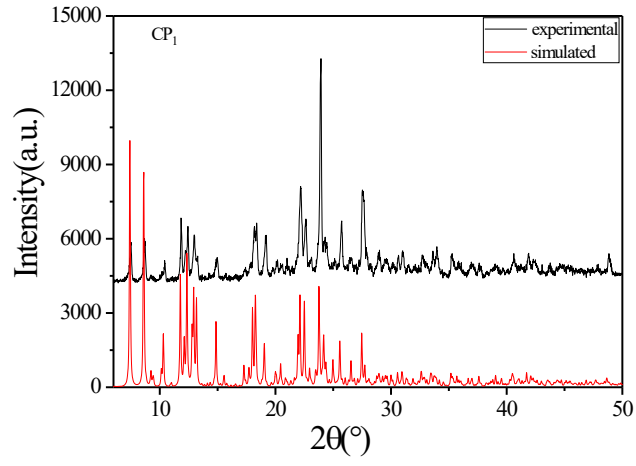

(a)

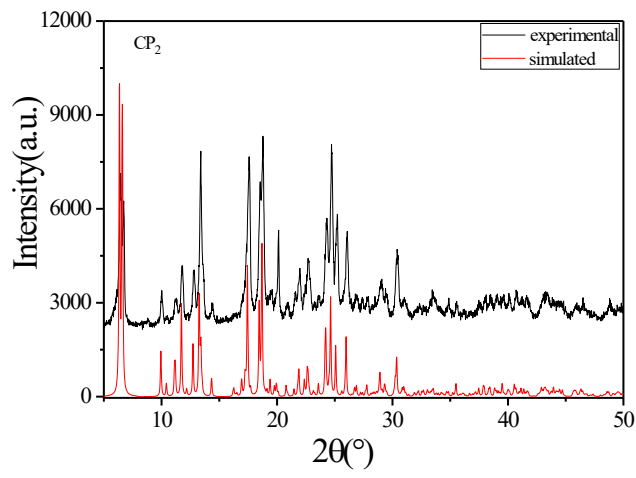

(b)

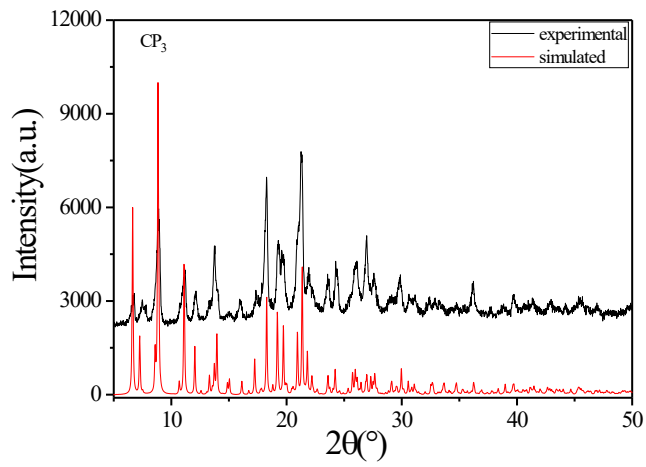

(c)

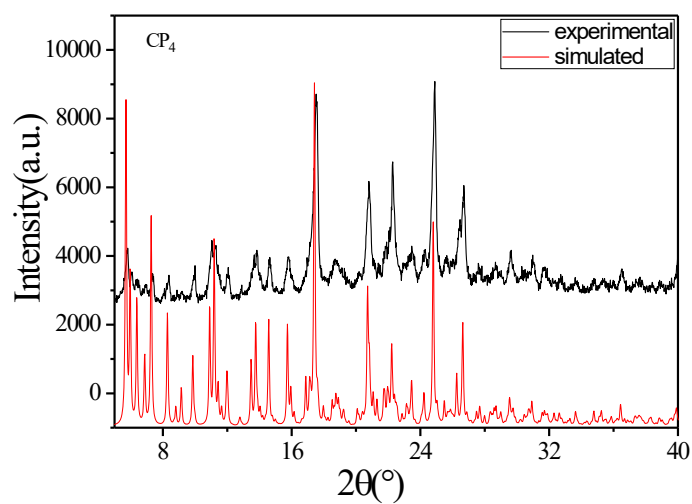

(d)

Fig. S8. The PXRD patterns of CP<sub>1</sub> (a), CP<sub>2</sub> (b), CP<sub>3</sub> (c), CP<sub>4</sub> (d).

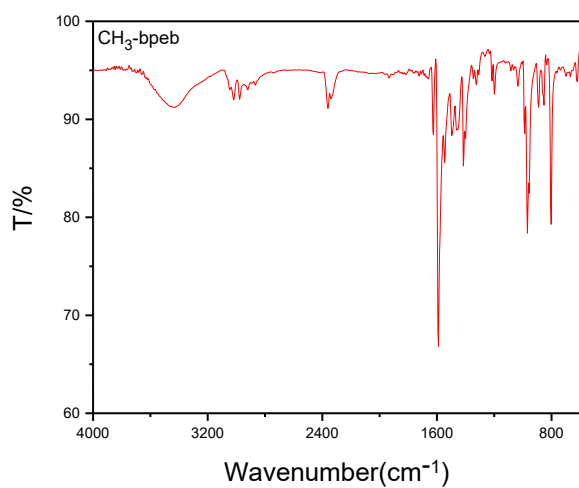

(a)

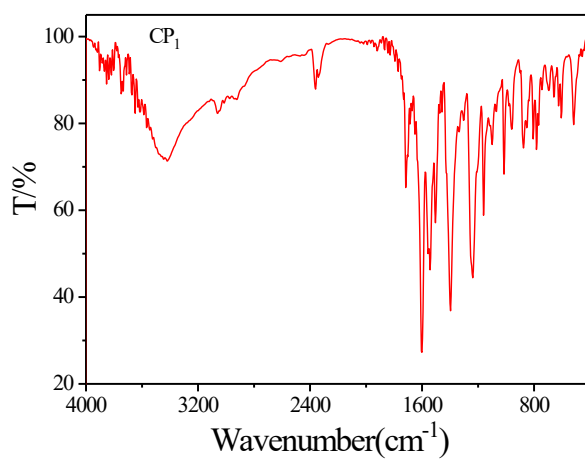

(b)

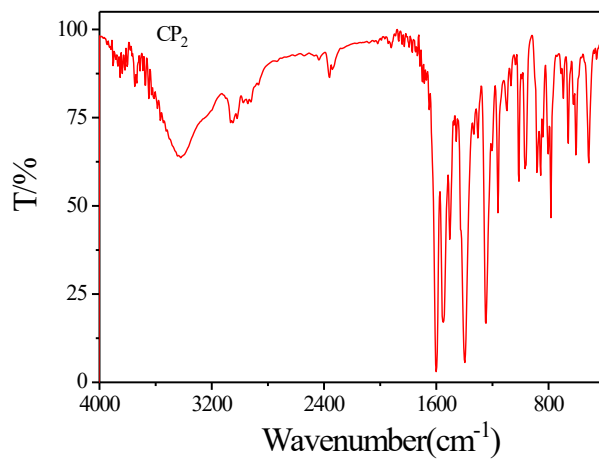

(c)

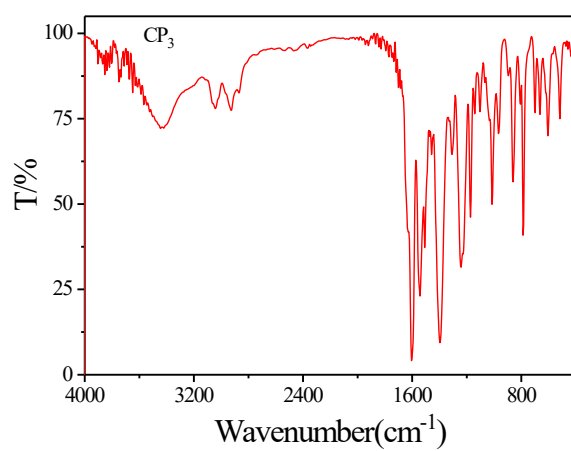

(d)

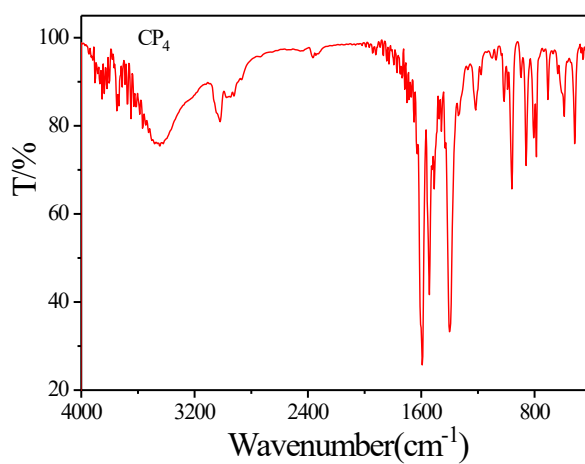

(e)

Fig. S9. IR spectra of CH<sub>3</sub>-bpeb (a), CP<sub>1</sub> (b), CP<sub>2</sub> (c), CP<sub>3</sub> (d), CP<sub>4</sub> (e).

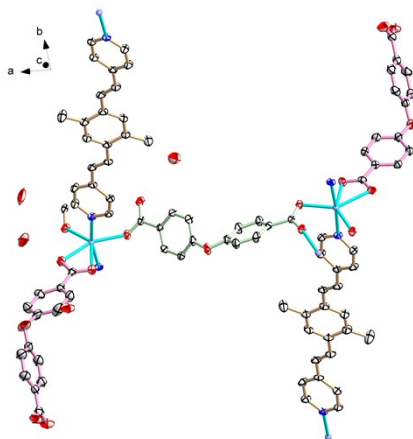

Fig. S10. The asymmetric unit of  $\text{CP}_1$ , showing ellipsoids at the 30% probability level.

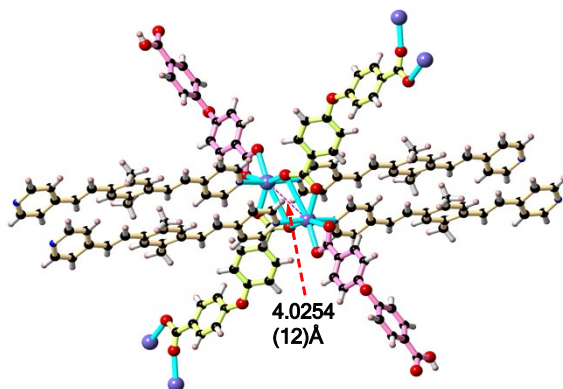

Fig. S11. The coordination environment of Cd (II) in  $\text{CP}_1$ .

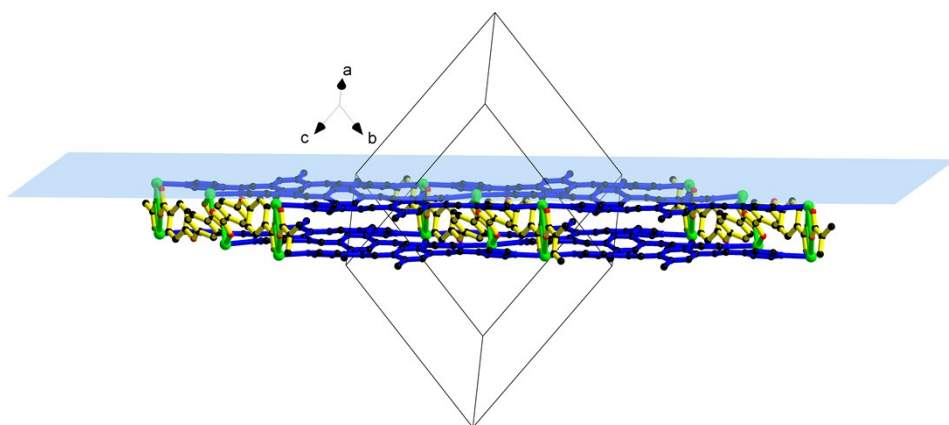

Fig. S12.  $[\text{Cd}_8(\text{CH}_3\text{-bpeb})_4(\text{oba})_2]$  units of  $\text{CP}_1$  expand into a 2D layer along the  $(-122)$  plane.

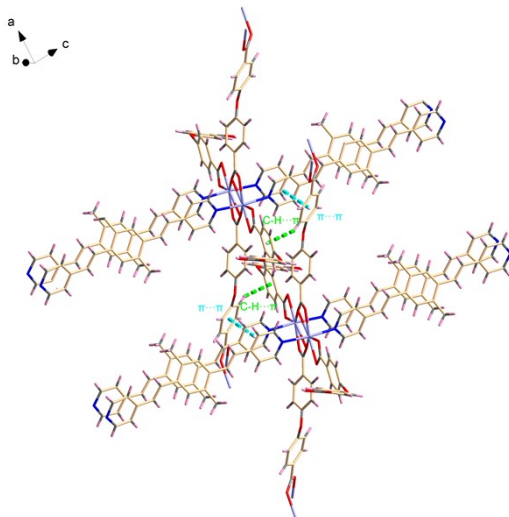

Fig. S13. Adjacent two-dimensional layers in  $CP_1$  are stabilized by  $\pi \cdots \pi$  and  $C-H \cdots \pi$  interactions.

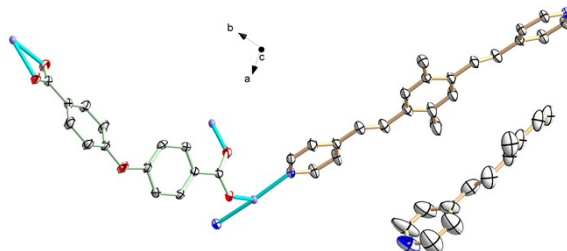

Fig. S14. The asymmetric unit of  $CP_2$ , showing ellipsoids at the 30% probability level.

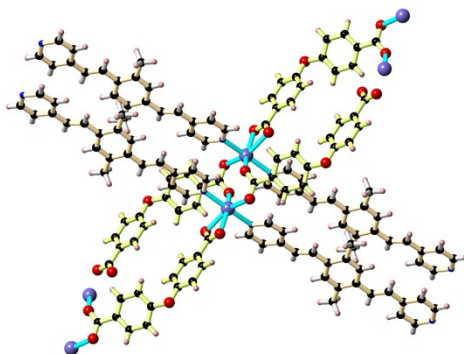

Fig. S15. The coordination environment of Cd (II) in  $CP_2$ .

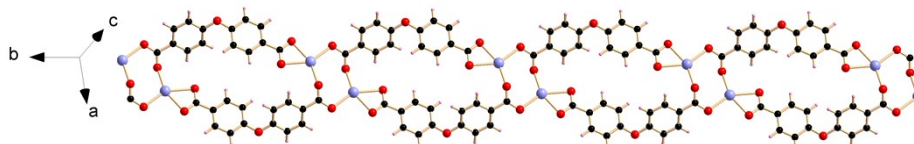

Fig. S16. The ditopic carboxyl ligands of  $CP_2$  extend the structure along the b axis.

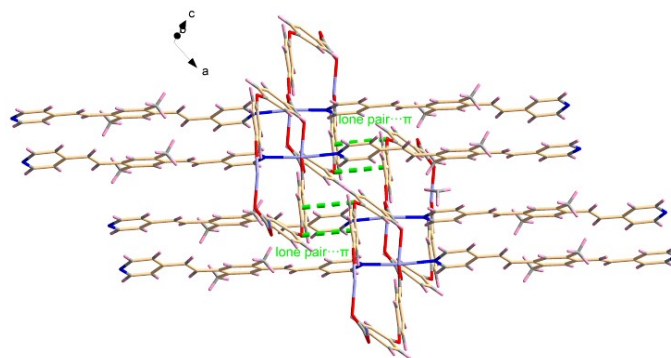

Fig. S17. The adjacent two-dimensional layers in  $\text{CP}_2$  are stabilized by lone pair $\cdots\pi$  interactions.

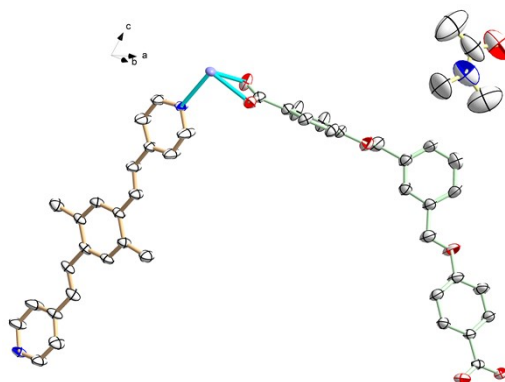

Fig. S18. The asymmetric unit of  $\text{CP}_3$ , showing ellipsoids at the 30% probability level.

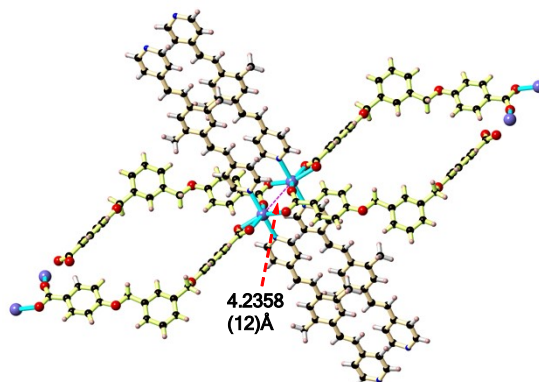

Fig. S19. The coordination environment of Cd (II) in  $\text{CP}_3$ .

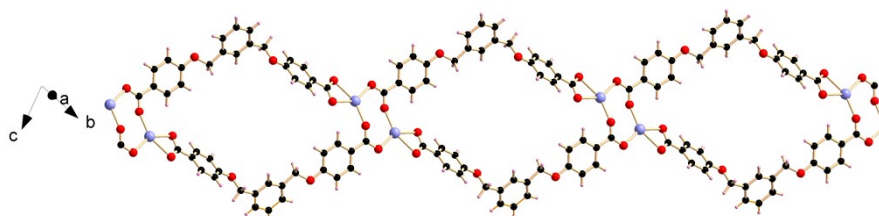

Fig. S20. The rhombic  $[\text{Cd}_4(\text{pbda})_2]$  unit of  $\text{CP}_3$  is extended into a 1D chain motif with a corner sharing model.



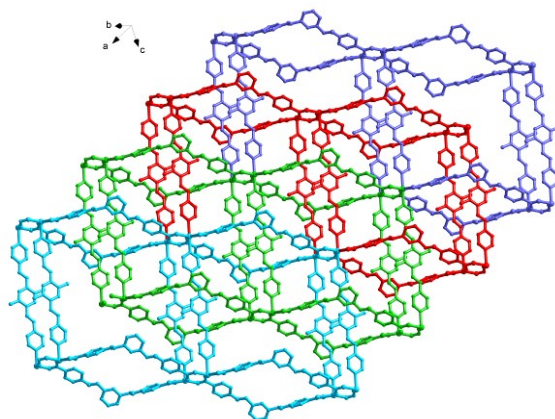

Fig. S21. The 2D layer structure of  $\text{CP}_3$  is packed along the a axis direction.

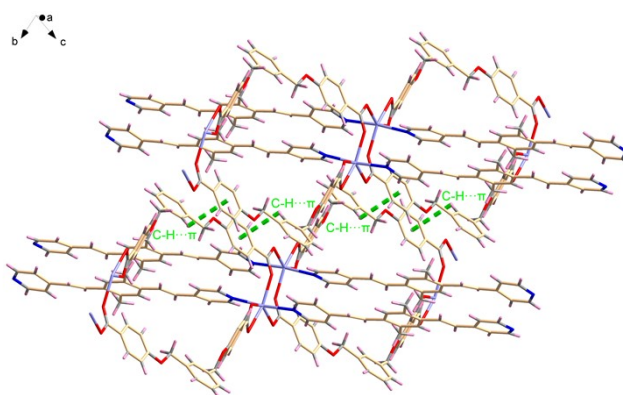

Fig. S22. The adjacent two-dimensional layers in  $\text{CP}_3$  are stabilized by  $\text{C-H}\cdots\pi$  interactions.

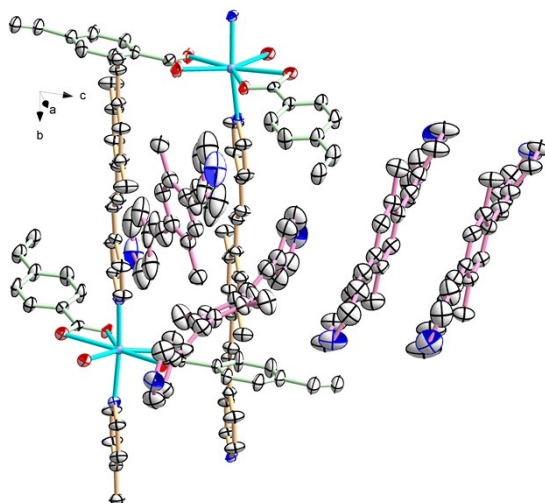

Fig. S23. The asymmetric unit of  $\text{CP}_4$ , showing ellipsoids at the 30% probability level.

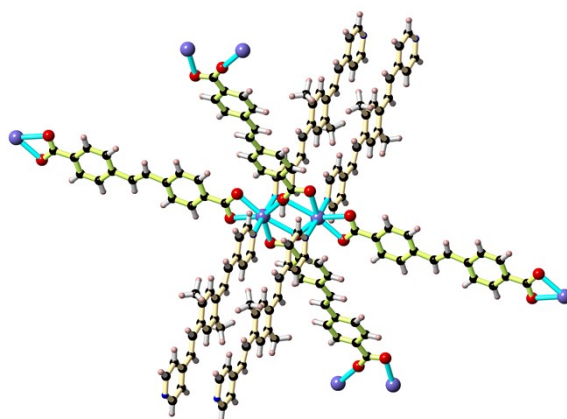

Fig. S24. The coordination environment of Cd (II) in CP<sub>4</sub>.

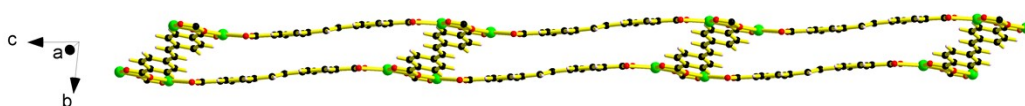

Fig. S25. A wave-like 2D network of [Cd<sub>8</sub>(bpa)<sub>4</sub>] along c axis.

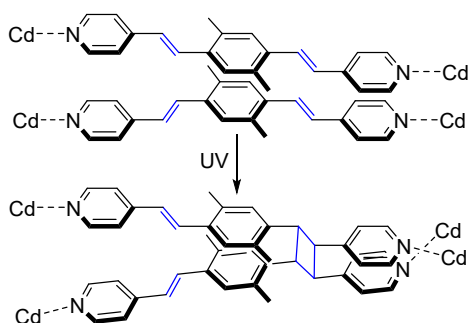

Scheme. S2 Representation of the CH<sub>3</sub>-bpeb pairs in structures CP<sub>1</sub>-CP<sub>4</sub>.

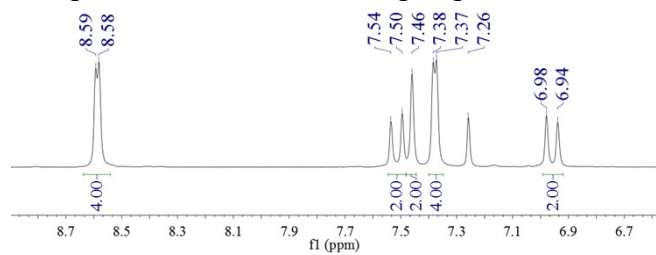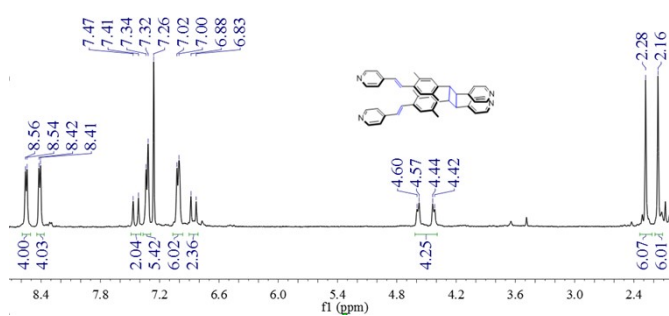

Fig. S26. <sup>1</sup>H NMR spectra of CH<sub>3</sub>-bpeb and bpdcd (CDCl<sub>3</sub>).

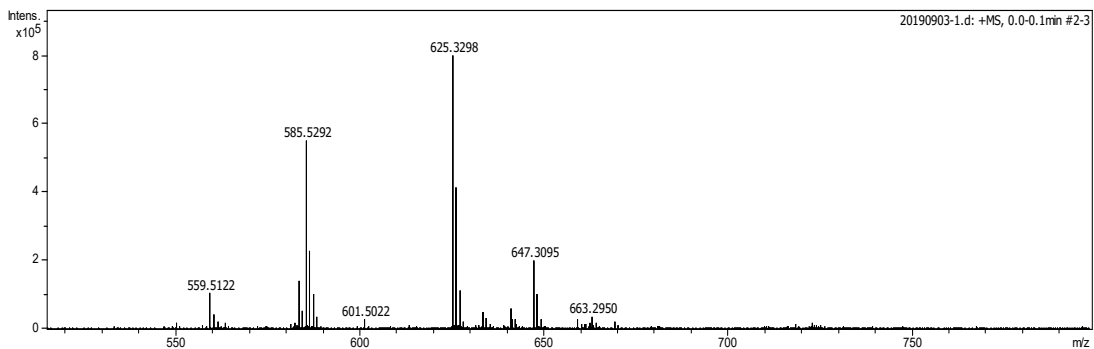

Fig. S27. The mass spectrum of bdpd.

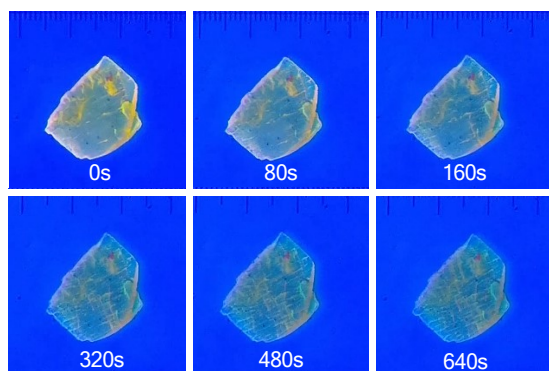

(a)

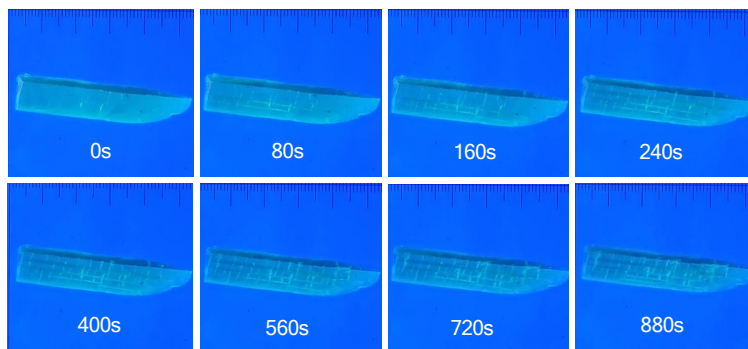

(b)

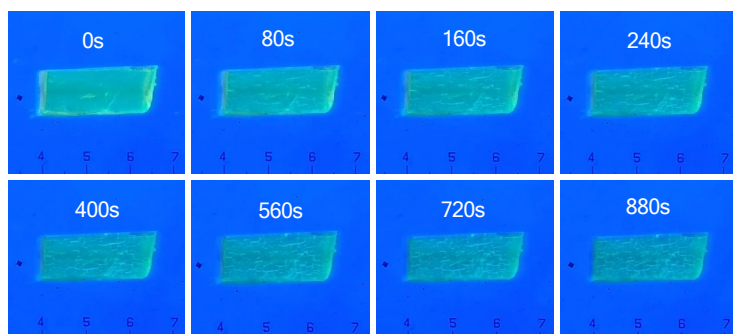

(c)

Fig. S28. Microscopic images of the mechanical response of CP<sub>1</sub> (a), CP<sub>3</sub> (b), CP<sub>4</sub> (c) at different times under 365nm UV lamp irradiation.

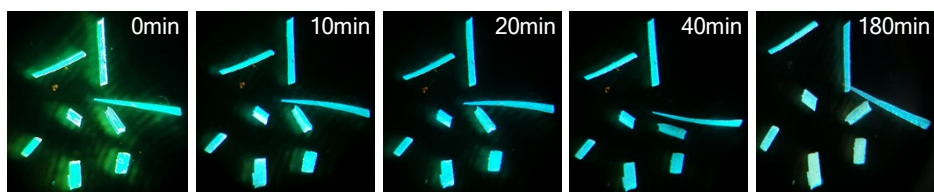

Fig. S29. Microscopic images of the fluorescence contrast of CP<sub>3</sub> after extended UV illumination times.

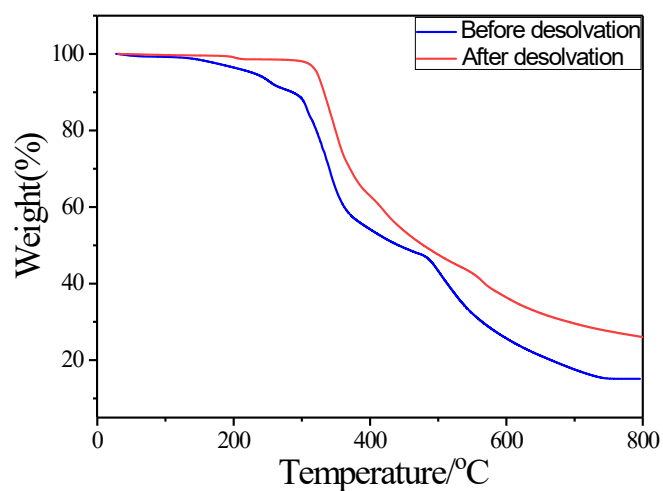

Fig. S30. The thermogravimetric analysis of CP<sub>3</sub> after the crystal was solvent-free.

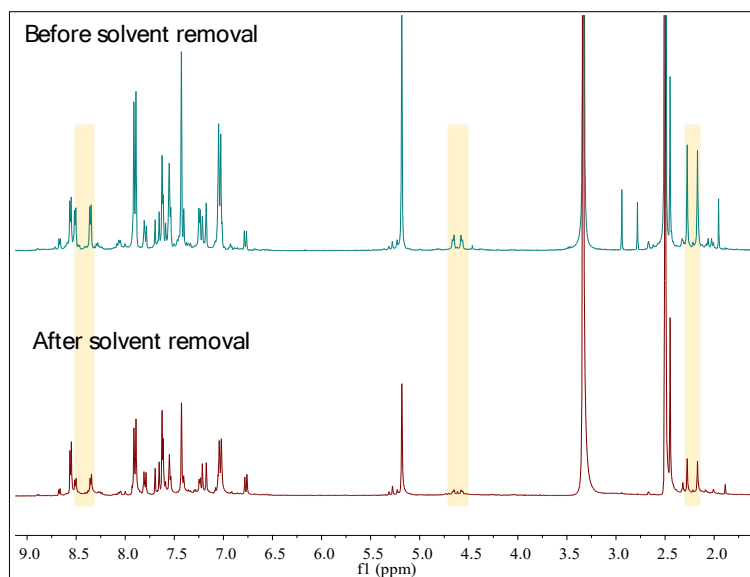

Fig. S31. <sup>1</sup>H NMR spectra of CP<sub>3</sub> before and after desolvation and irradiation under UV light ( $\lambda = 365$  nm) (*d*<sub>6</sub>-DMSO).

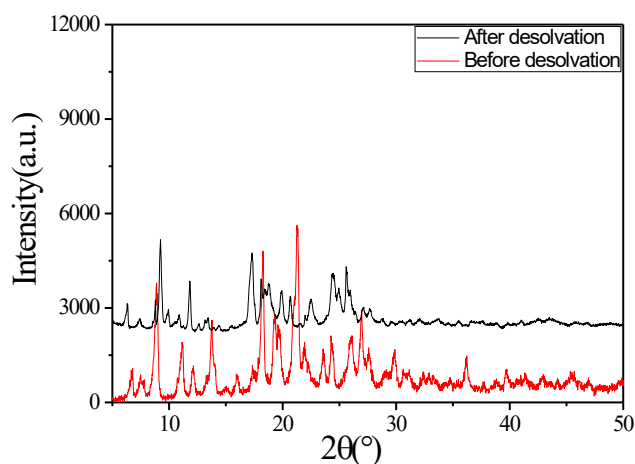

Fig. S32. PXRD patterns of CP<sub>3</sub> before and after desolvation.

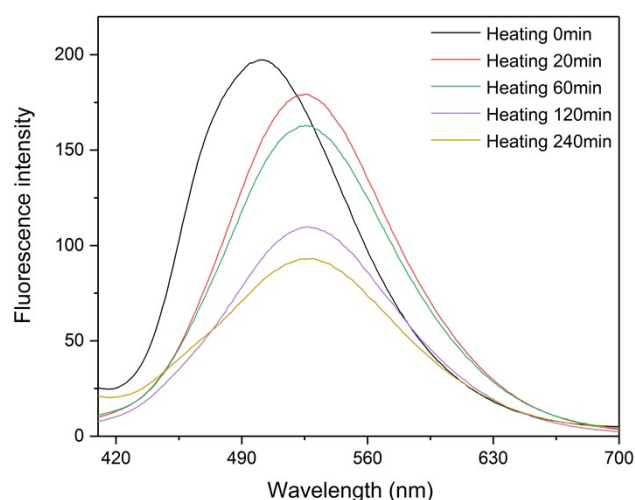

Fig. S33. Solid-state emission spectra of CP<sub>3</sub> after different heating times.

## References

1. F. L. Hu, Y. Mi, C. Zhu, B. F. Abrahams, P. Braunstein and J. P. Lang, *Angew. Chem., Int. Ed.*, 2018, **57**, 12696-12701.
2. F. L. Hu, H. F. Wang, D. Guo, H. Zhang, J. P. Lang and J. E. Beves, *Chem. Commun.*, 2016, **52**, 7990-7993.
3. A. C. G. Sheldrick, *Sect. C: Struct. Chem.*, 2015, **71**, 3–8.
4. M. F. Wang, Y. Mi, F. L. Hu, Z. Niu, X. H. Yin, Q. Huang, H. F. Wang and J. P. Lang, *J. Am. Chem. Soc.*, 2020, **142**, 700-704.
5. F. L. Hu, Z. Qin, M. F. Wang, X. W. Kang, Y. L. Qin, Y. Wang, S. L. Chen, D. J. Young and Y. Mi, *Dalton Trans.*, 2020, **49**, 10858-10865.
6. Y. Wang, M. F. Wang, D. J. Young, H. Zhu, F. L. Hu, Y. Mi, Z. Qin, S. L. Chen and J. P. Lang, *Chem. Commun.*, 2021, **57**, 1129-1132.
